# Supplementary material for: シンガポール：創造都市・グローバル文化政策・コスモポリタニズム
Source: PeerJ journal article supplement (doi:10.7717/peerj.1409), 2010-01-01

Normal Q-Q Plot

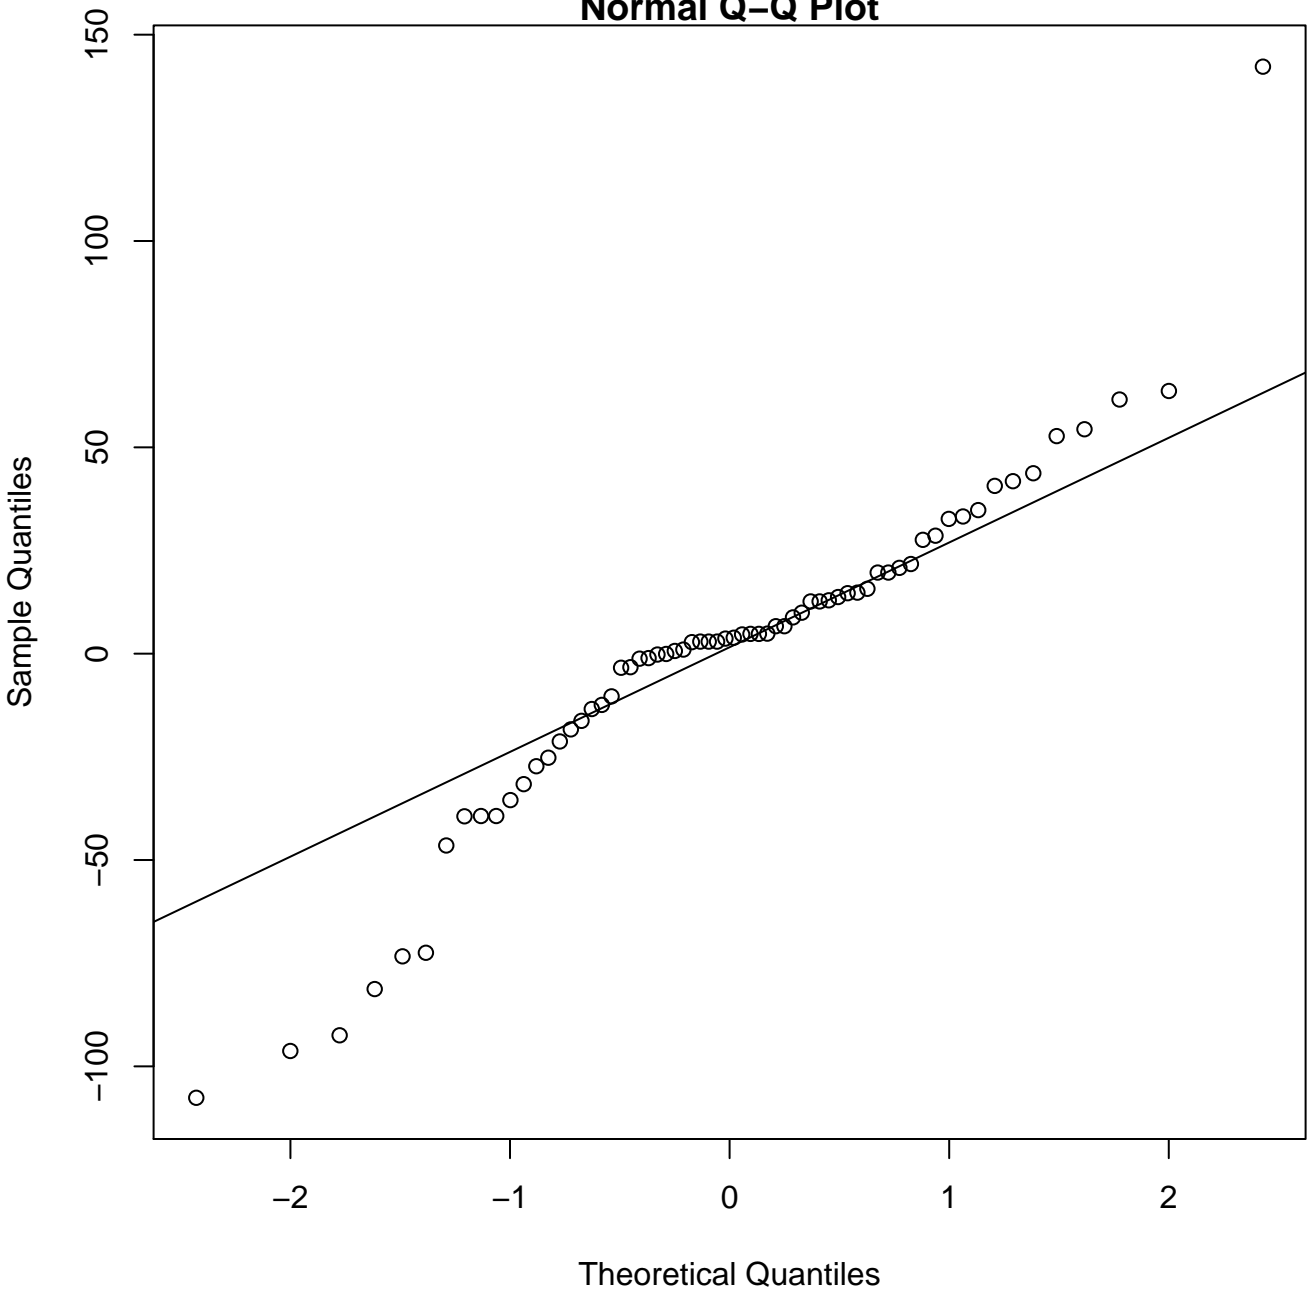

Supplement: eggs_by_shrimpsize_resid.pdf [file eggs_by_shrimpsize_resid.pdf]
